# Supplementary material for: Meteorological Influences on the Incidence of Aneurysmal Subarachnoid Hemorrhage – A Single Center Study of 511 Patients
Source: PubMed Central journal article supplement (PMC3847045; doi:10.1371/journal.pone.0081621), 2013-12-02

### Supplemental Figure S3

Histogram of the mean deviation from the 10-year monthly means from a Monte Carlo simulation (random selection of 511 days within the same time period) with 1000 re-samplings, assuming that no relationship between SAH and temperature exists. The green line corresponds to the observed mean given in panel Supplemental Figure 2 and the blue distribution results from the Monte Carlo simulation. The P-value gives the number of Monte Carlo member to the right of the observed value.

#### A gusts

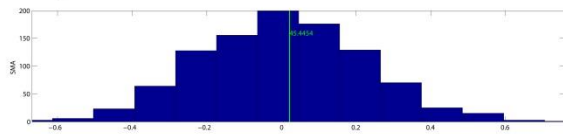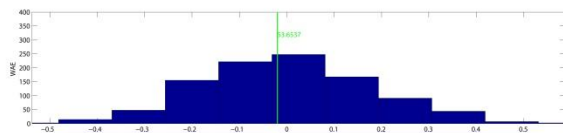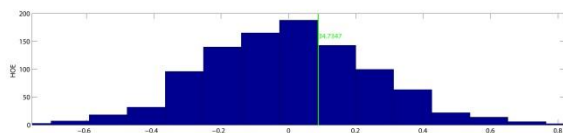

#### B surface pressure

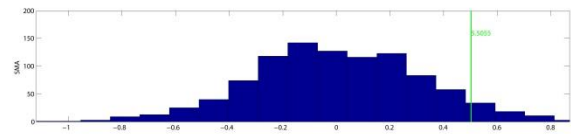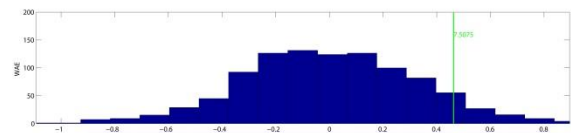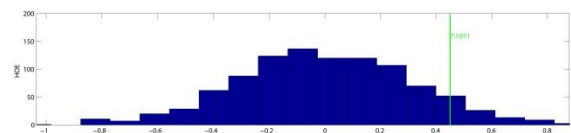

#### C precipitation [m/s]

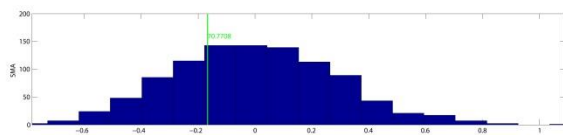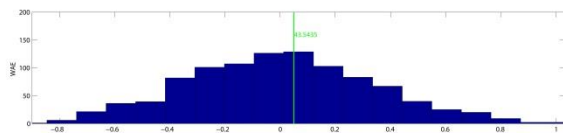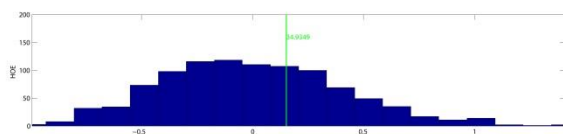

#### D relative humidity [hPa]

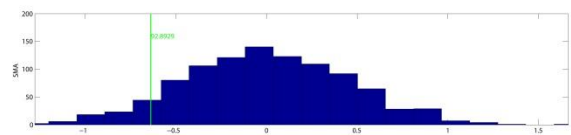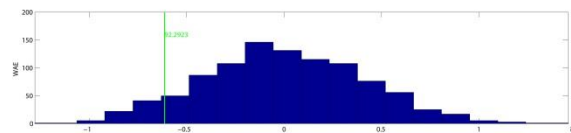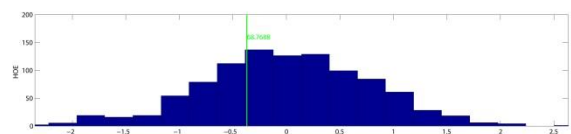

#### E sunshine duration [mm/h]

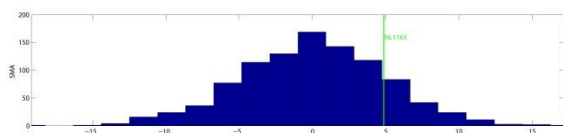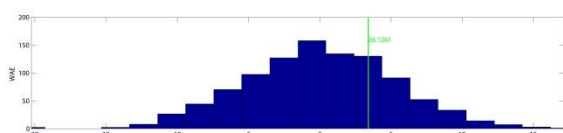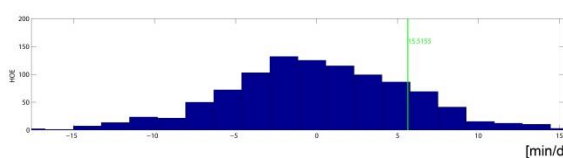

#### F mean temperature [%]

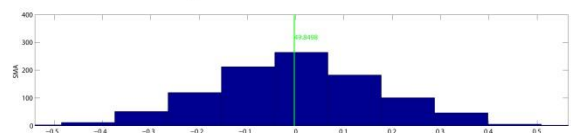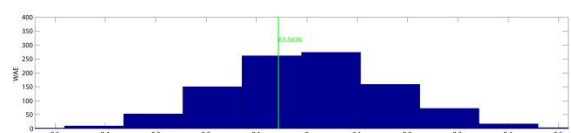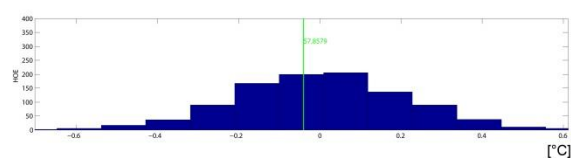

#### E sunshine duration [min/d]



#### F mean temperature [°C]



Supplement: pone.0081621.s003.pdf [file pone.0081621.s003.pdf]
