# Supplementary material for: Meteorological Influences on the Incidence of Aneurysmal Subarachnoid Hemorrhage – A Single Center Study of 511 Patients
Source: PubMed Central journal article supplement (PMC3847045; doi:10.1371/journal.pone.0081621), 2013-12-02

## Supplemental Figure S4

Histogram of observed parameters (gust, surface pressure, precipitation, relative humidity, sunshine duration, and mean temperature) on SAH days relative to 2 days prior to the bleeding event (short-time change). The green value gives the mean over all observed temperature anomalies on SAH days. The values are shown for the three stations SMA, WAE, and HOE separately.

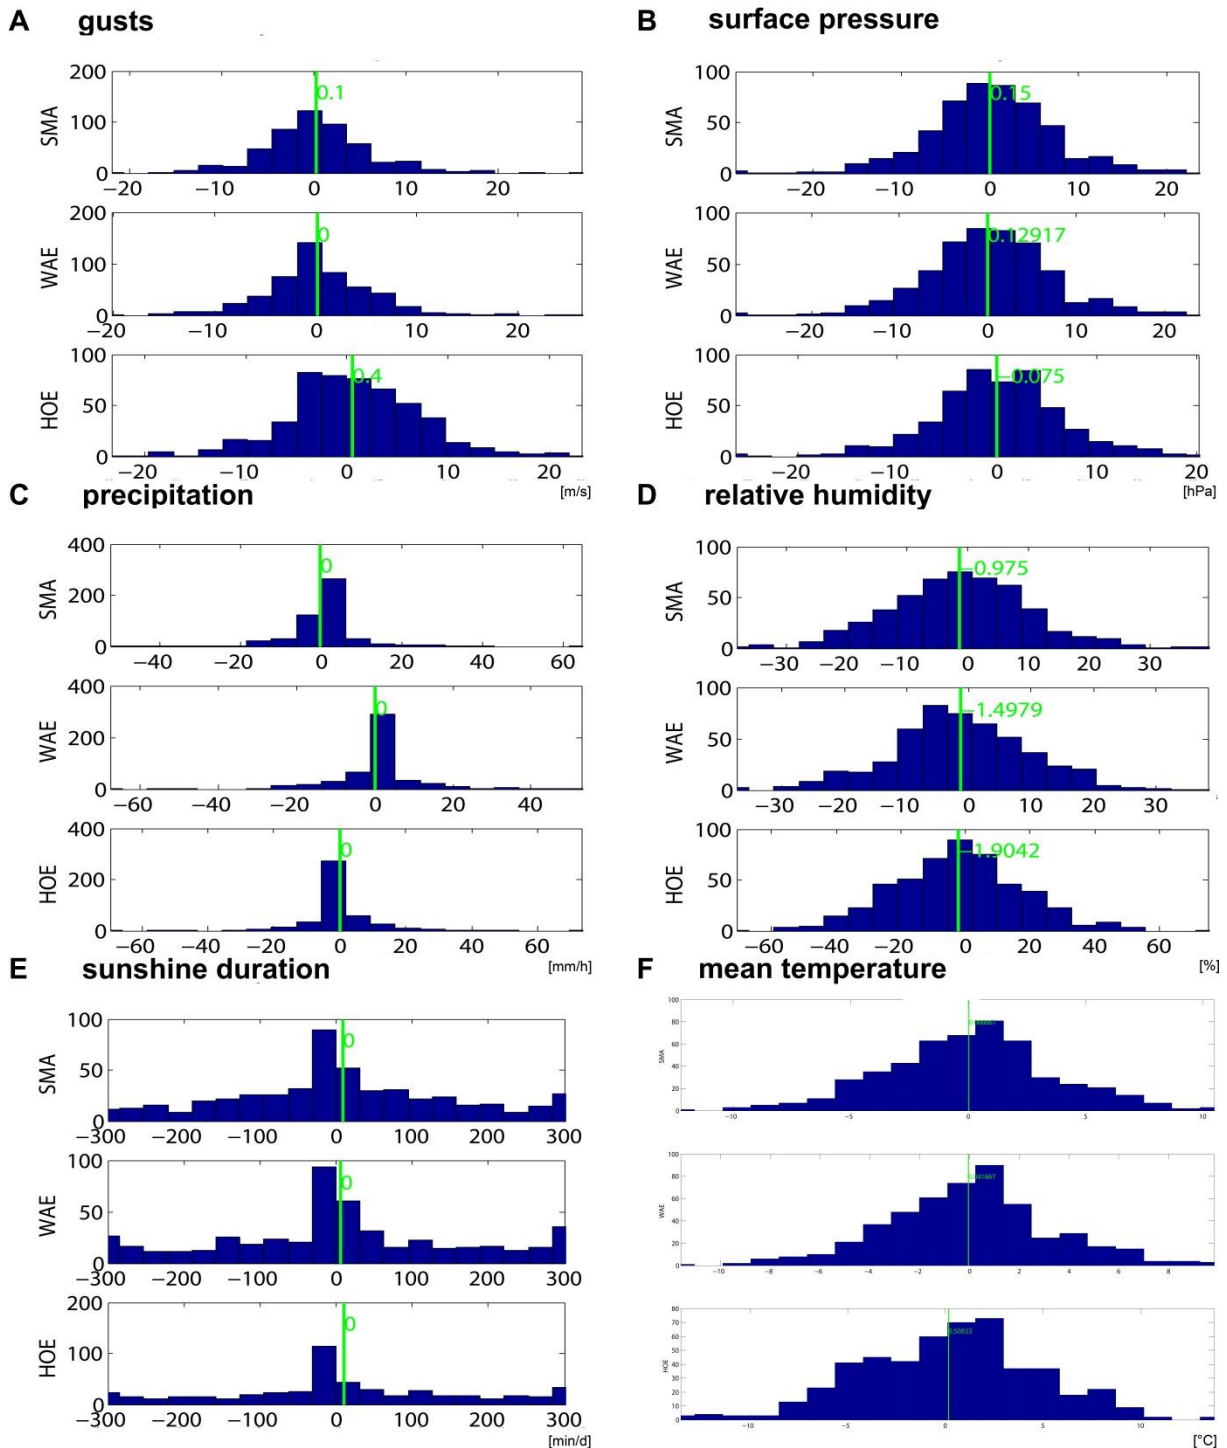

Supplement: pone.0081621.s004.pdf [file pone.0081621.s004.pdf]
