# Supplementary material for: Meteorological Influences on the Incidence of Aneurysmal Subarachnoid Hemorrhage – A Single Center Study of 511 Patients
Source: PubMed Central journal article supplement (PMC3847045; doi:10.1371/journal.pone.0081621), 2013-12-02

## Supplemental Figure S5

Histogram of the mean deviation from 2 days prior to the bleeding event from a Monte Carlo simulation (random selection of 511 days within the same time period) with 1000 re-samplings, assuming that no relationship between SAH and temperature exists. The green line corresponds to the observed mean given in Supplemental Figure 4 and the blue distribution results from the Monte Carlo simulation. The P-value gives the number of Monte Carlo member to the right of the observed value.

### A gusts

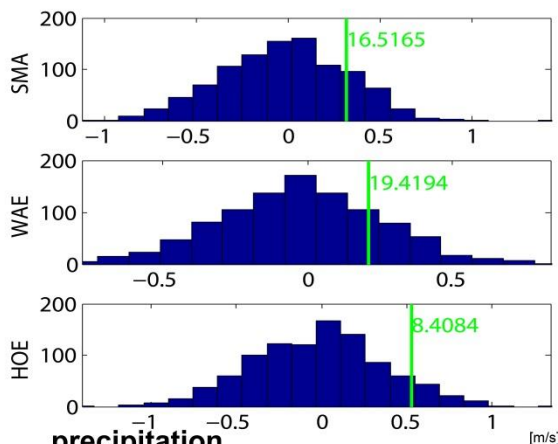

### B surface pressure

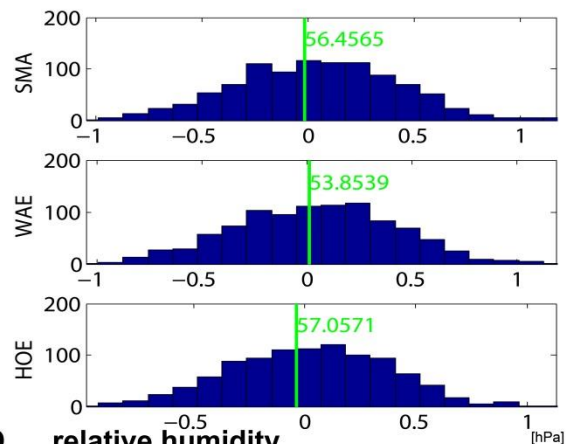

### C precipitation

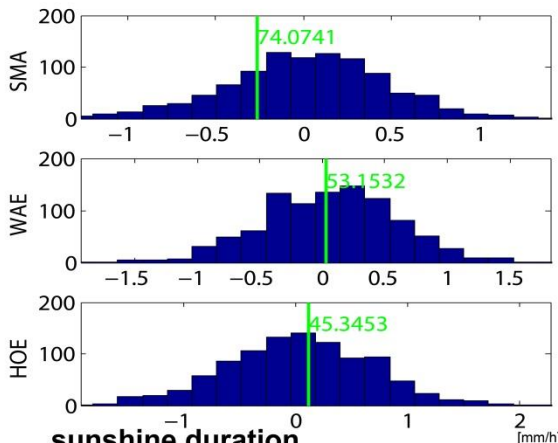

### D relative humidity

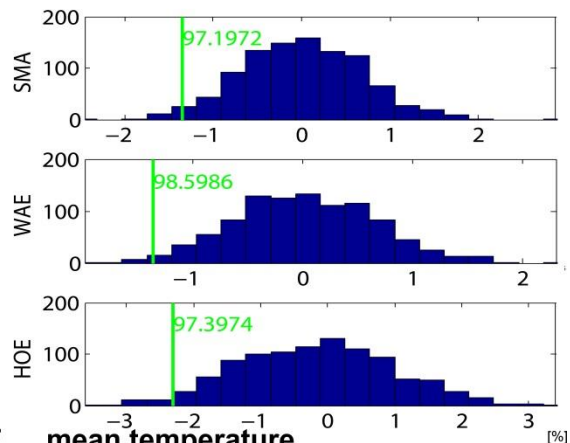

### E sunshine duration

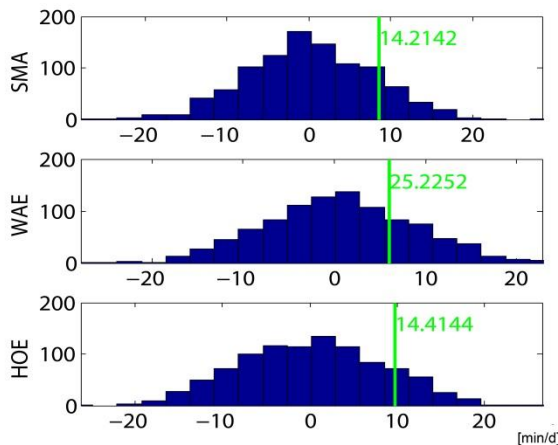

### F mean temperature

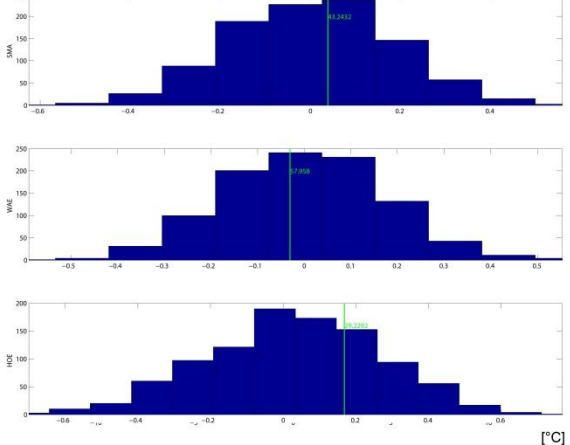

Supplement: pone.0081621.s005.pdf [file pone.0081621.s005.pdf]
